# Supplementary material for: Towards magnetic responsive chalcogenides for efficient separation in water treatment: facile synthesis of magnetically layered chalcogenide Fe3O4/KMS-1 composite adsorbents and their zinc removal application in water
Source: Royal Society of Chemistry journal article supplement (doi:10.1039/c7qi00664k), 2017-12-15

## Supporting information

### **Towards magnetic responsive chalcogenides for efficient separation in water treatment: Facile synthesis of magnetic layered chalcogenides Fe<sub>3</sub>O<sub>4</sub>/KMS-1 composite adsorbent and their zinc removal application in water**

Jian-Rong Li<sup>1,2,3</sup>, Lei Xu<sup>1</sup>, Ming-Lai Fu<sup>1\*</sup>, Yun-Xia Wang<sup>1</sup>, Hang Xiao<sup>2,3\*</sup>

1. Key Laboratory of Urban Pollutant Conversion, Institute of Urban Environment, Chinese Academy of Sciences, Xiamen, 361021, PR China

2. Center for Excellence in Regional Atmospheric Environment, Institute of Urban Environment, Chinese Academy of Sciences, Xiamen, 361021, PR China

3. Key Lab of Urban Environmental Processes and Pollution Control, Ningbo Urban Environment Observation and Research Station-NUEORS, Chinese Academy of Sciences, Ningbo, 315800, PR China

#### **Corresponding authors:**

\*Prof. Ming-Lai Fu

E-mail: mlfu@iue.ac.cn

Tel./Fax: 86-592-6190762

\*Prof. Hang Xiao

E-mail: hxiao@iue.ac.cn

Tel./Fax: 86-574-86784813

**Table S1. Isotherm parameters for adsorption of Zn(II) by different samples.**

| Samples                        | Langmuir |         |       | Freundlich |       |       |
|--------------------------------|----------|---------|-------|------------|-------|-------|
|                                | $q_m$    | $K_L$   | $R^2$ | 1/n        | $K_f$ | $R^2$ |
| KMS-1                          | 140.1    | 0.210   | 0.988 | 0.112      | 75.1  | 0.966 |
| Fe <sub>3</sub> O <sub>4</sub> | no date  | no date | 0.146 | 0.960      | 0.108 | 0.984 |
| FK <sub>1</sub>                | 89.1     | 0.060   | 0.985 | 0.192      | 28.6  | 0.972 |
| FK <sub>0.5</sub>              | 100.8    | 0.123   | 0.998 | 0.135      | 46.3  | 0.902 |
| FK <sub>0.4</sub>              | 105.3    | 0.096   | 0.996 | 0.119      | 51.4  | 0.978 |
| FK <sub>0.3</sub>              | 110.5    | 0.200   | 0.999 | 0.108      | 60.0  | 0.890 |

**Table S2. Kinetic parameters for the removal of Zn(II) by KMS-1 and FK<sub>0.3</sub>**

| Samples           | $q_{e \text{ exp}}$<br>(mg/g) | Pseudo- first-order           |                               |        | Pseudo- second-order       |                               |        |
|-------------------|-------------------------------|-------------------------------|-------------------------------|--------|----------------------------|-------------------------------|--------|
|                   |                               | $k_1$<br>(min <sup>-1</sup> ) | $q_{e \text{ cal}}$<br>(mg/g) | $R^2$  | $k_2 * 10^3$<br>(g/mg·min) | $q_{e \text{ cal}}$<br>(mg/g) | $R^2$  |
| KMS-1             | 104.3                         | 0.032                         | 29.3                          | 0.8473 | 3.71                       | 105.3                         | 0.9998 |
| FK <sub>0.3</sub> | 88.6                          | 0.025                         | 30.02                         | 0.9863 | 2.00                       | 90.5                          | 0.9996 |

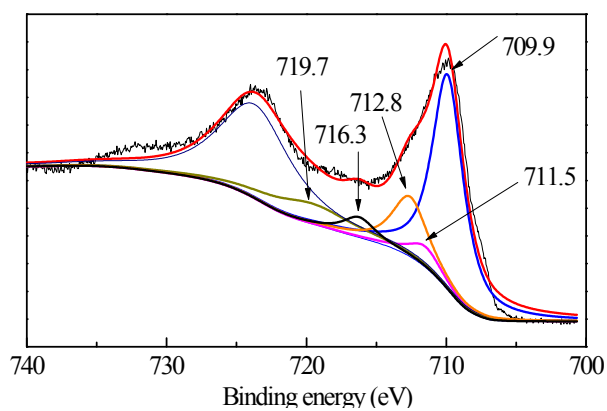**Fig. S1. XPS spectra of Fe 2p.**

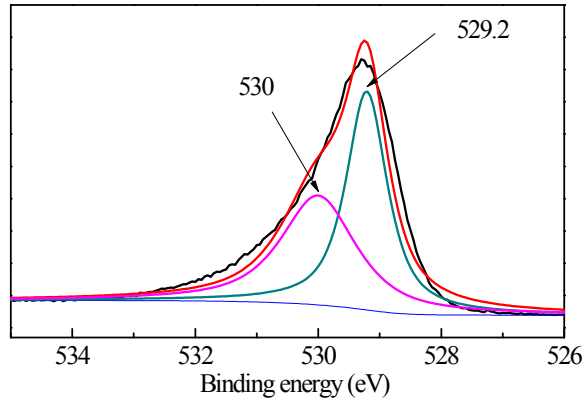

**Fig. S2.** XPS spectra of O 1s.

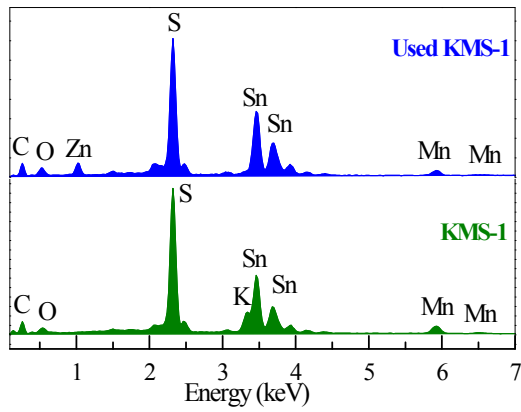

**Fig. S3.** EDS of KMS-1 and used KMS-1

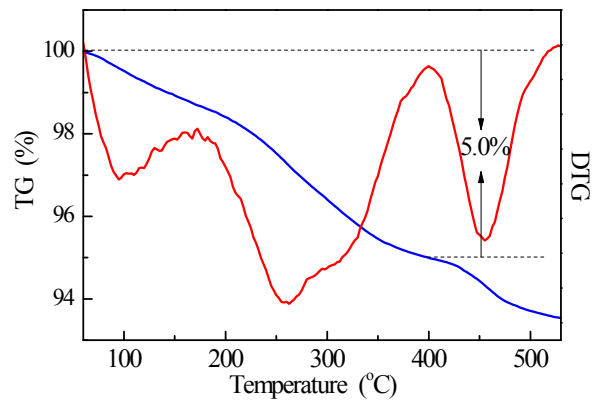

**Fig. S4.** TG and DTG curves for the used KMS-1.

**The reaction equation of ion exchange between KMS-1 and Zn:**

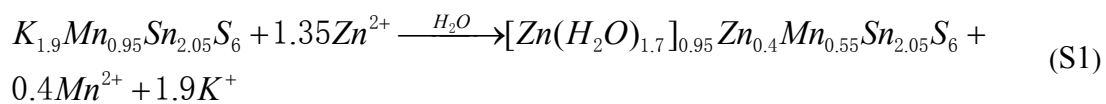

Supplement: c7qi00664k1.pdf [file c7qi00664k1.pdf]
